# Supplementary material for: Dual-functional iodine photoelectrode enabling high performance photo-assisted rechargeable lithium iodine batteries
Source: Royal Society of Chemistry journal article supplement (doi:10.1039/d2ta00258b), 2022-01-01
Supplement: d2ta00258b1.pdf [file d2ta00258b1.pdf]

*Electronic Supplementary Information*

**Dual-Functional Iodine Photoelectrode Enabling High Performance Photo-  
assistant Rechargeable Lithium Iodine Batteries**

Jingfa Li<sup>a\*</sup>, Hongmin Liu<sup>a</sup>, Kaiwen Sun<sup>b</sup>, Ronghao Wang<sup>a</sup>, Chengfei Qian<sup>a</sup>, Feng Yu<sup>a</sup>,  
Lei Zhang<sup>a</sup>, Weizhai Bao<sup>a\*</sup>

<sup>a</sup> School of Chemistry and Materials Science

Nanjing University of Information Science & Technology

Nanjing, 210044, China.

E-mail: aplijf@nuist.edu.cn; weizhai.bao@nuist.edu.cn

<sup>b</sup> Australian Centre for Advanced Photovoltaics

School of Photovoltaic and Renewable Energy Engineering

University of New South Wales

Sydney, Australia 2052.

**The working principle of the proposed photo-assisted rechargeable Li-I<sub>2</sub> battery can be summarized as follows:**

Photoassisted charge-Cathode:

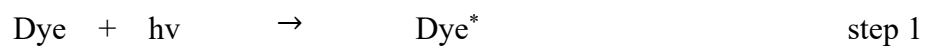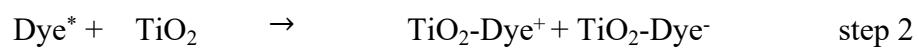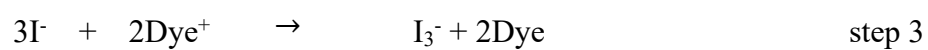

Anode:

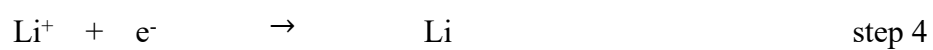

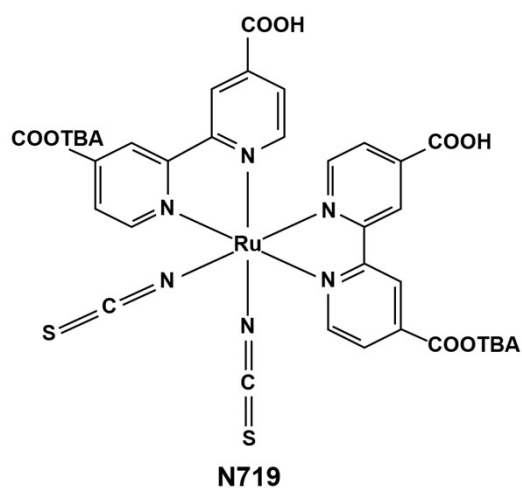

**Figure S1.** Structure of dye N719.

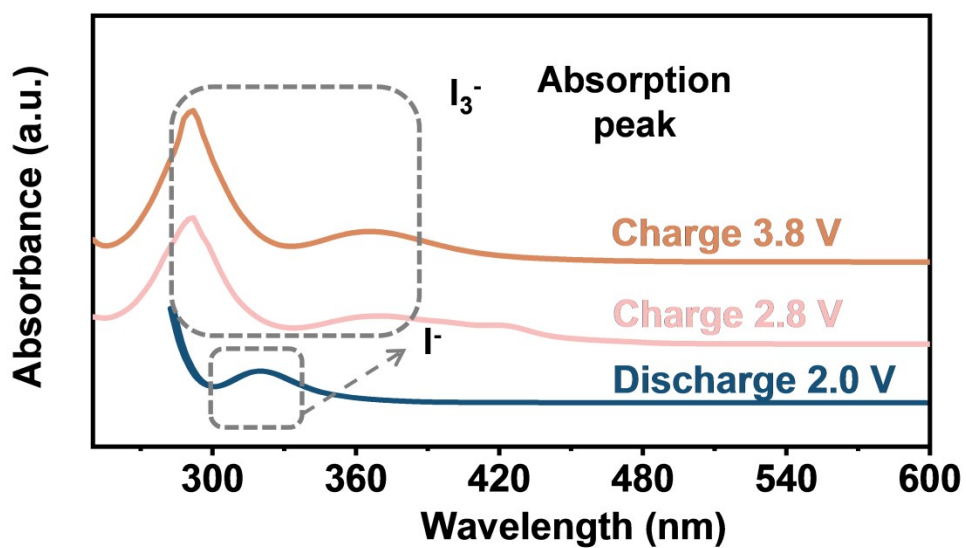

**Figure S2.** Ultraviolet-visible spectrum of the electrolyte used after cycling under illuminated conditions.

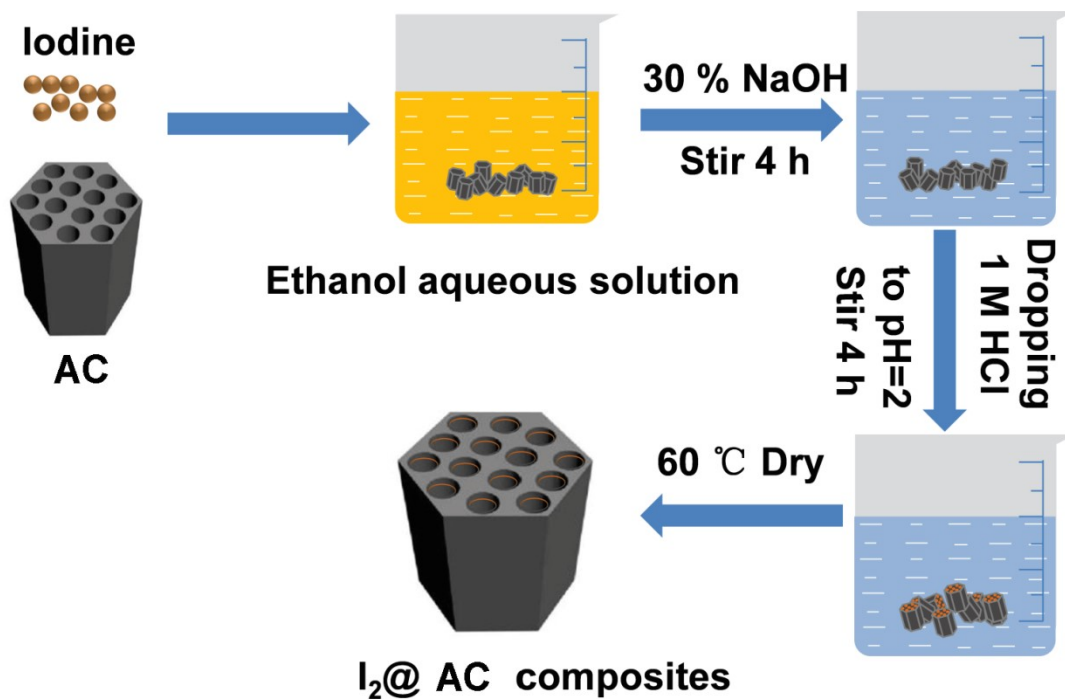

**Figure S3.** *In situ* deposition route of fabricating the  $I_2@AC$  composites.

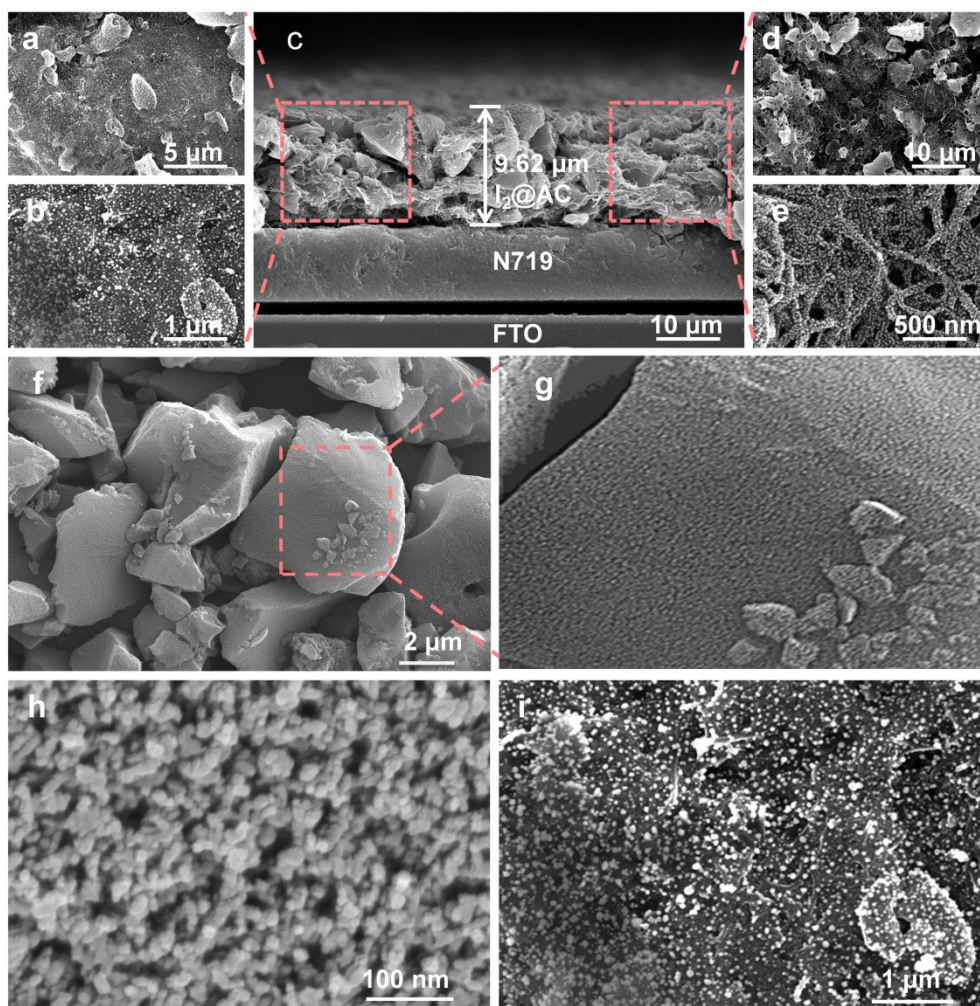

**Figure S4.** a) and b) SEM diagram of the battery charging to 2.8V. c) Cross-sectional view of the material coated on the FTO conductive glass. d) and e) SEM diagram of the battery discharging to 3.8V. f) Low and g) high-magnification SEM of the  $I_2@AC$  composites. Initial SEM diagram of the h)  $TiO_2$  and i) the hybrid  $I_2@AC/N719$ -dye/ $TiO_2$  photoelectrode.

**Figure. S4a, S4b** and **S4d, S4e** are SEM images of the photo-assisted rechargeable Li- $I_2$  battery after cyclic charging to 2.8V and 3.8V respectively. Element mapping in **Figure 2a-d** showed that the iodine ions generated by the reaction are uniformly attached to the surface of activated carbon. The  $I_2@AC$  composite is coated on the N719 sensitized upper layer, as shown in **Figure S4c**. **Figure S4f, S4g** are SEM images of the uncirculated  $I_2@AC$  composite material at low and high magnification, and the porous structure of activated carbon can be seen. The morphology of the mesoporous  $TiO_2$  nanoparticle film is shown in **Figure S4h**, and the morphology of the integrated electrode of  $I_2@AC/N719$ -dye/ $TiO_2$  is shown in

**Figure S4i.** It is observed that  $I_2@AC/N719$ -dye can be well adsorbed on the  $TiO_2$  nanofilm surface, which can increase the efficiency of interfacial charge injection.

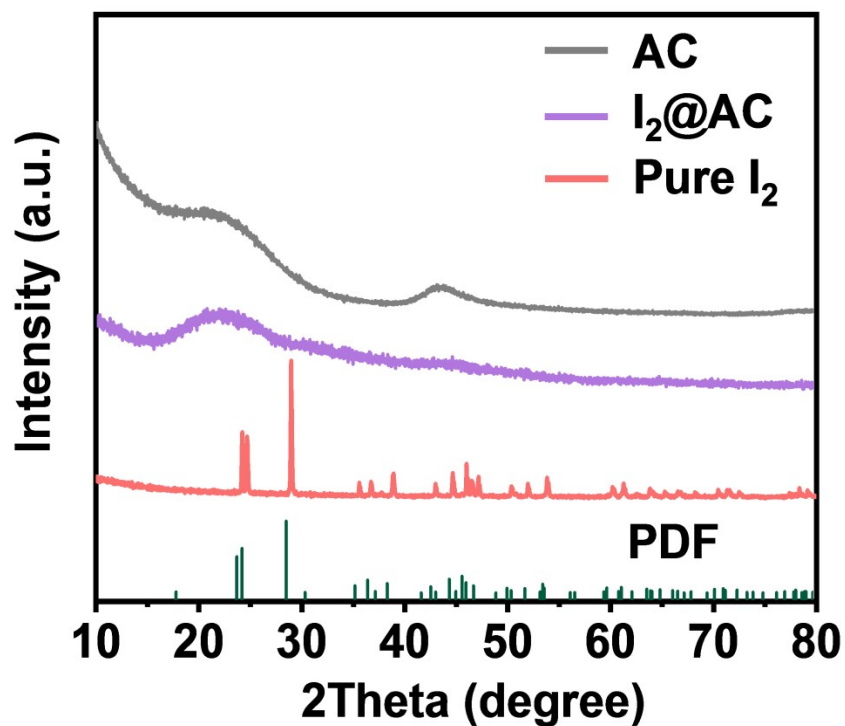

**Figure S5.** XRD patterns of pure iodine, pure AC and  $I_2@AC$ .

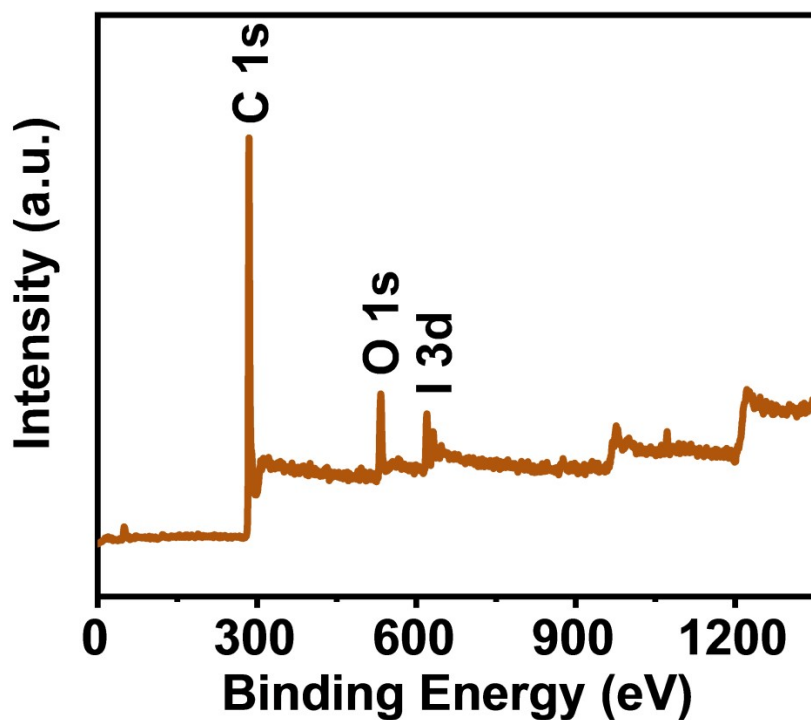

**Figure S6.** The XPS C 1s, I 3d, and O 1s peaks of  $I_2@AC$  composites.

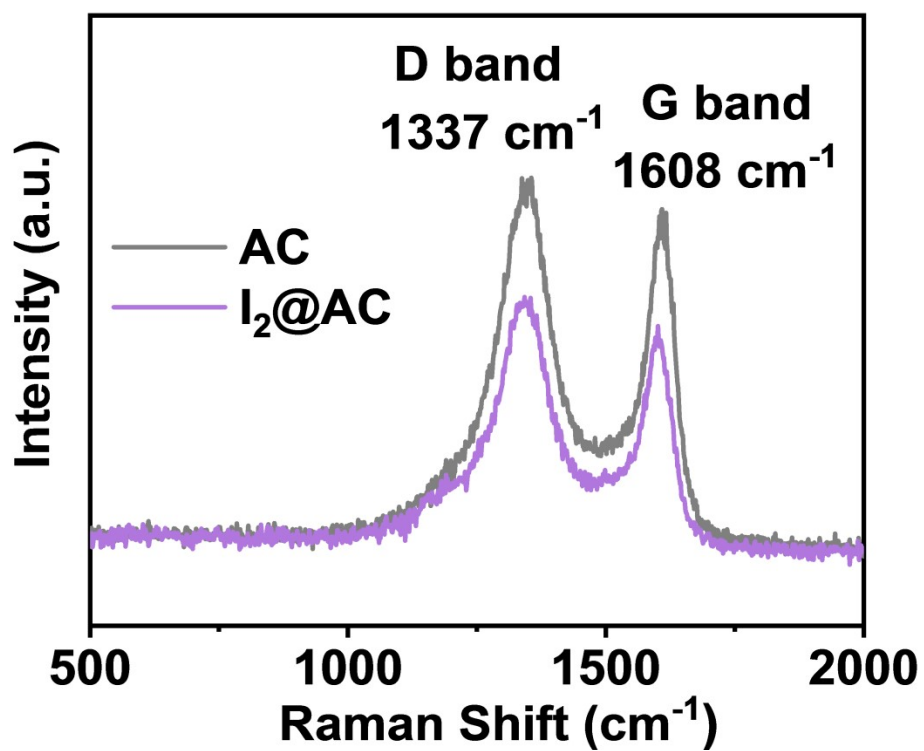

Figure S7. Raman spectra of pure iodine, pure AC and I<sub>2</sub>@AC.

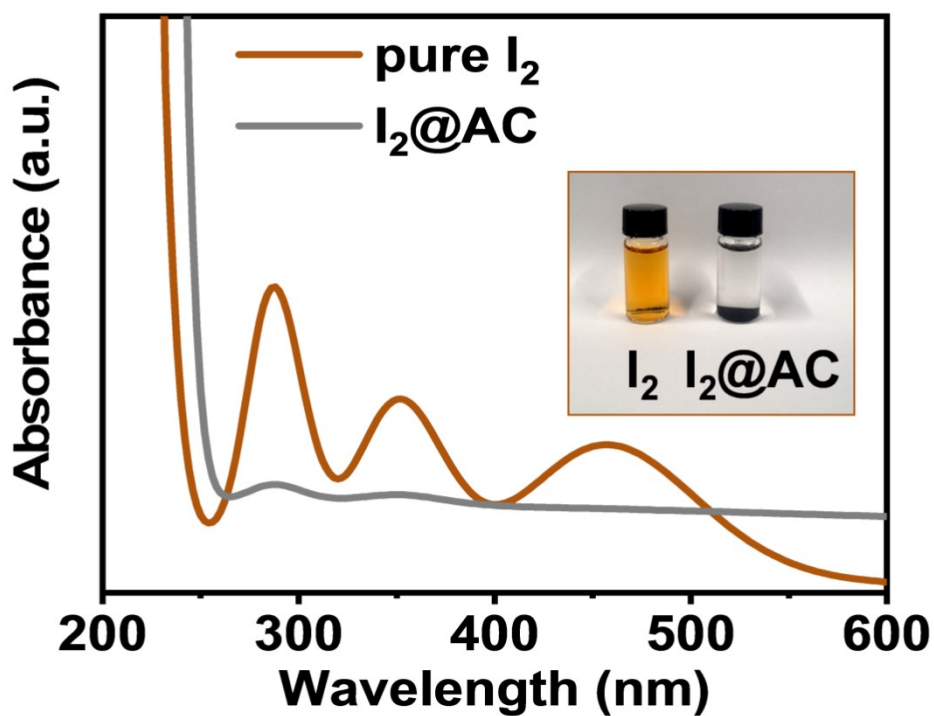

**Figure S8.** The UV-vis absorption spectra of I<sub>2</sub>@AC composites and I<sub>2</sub>.

Elemental iodine and I<sub>2</sub>@AC composite materials were dissolved in ethanol aqueous solution. After one week, the solutions were tested by The UV-vis absorption spectra (**Figure S8**). The test results show that the I<sub>2</sub>@AC composite material does not have an obvious peak of iodide ion, which verifies that iodine is very well adsorbed in the matrix AC.



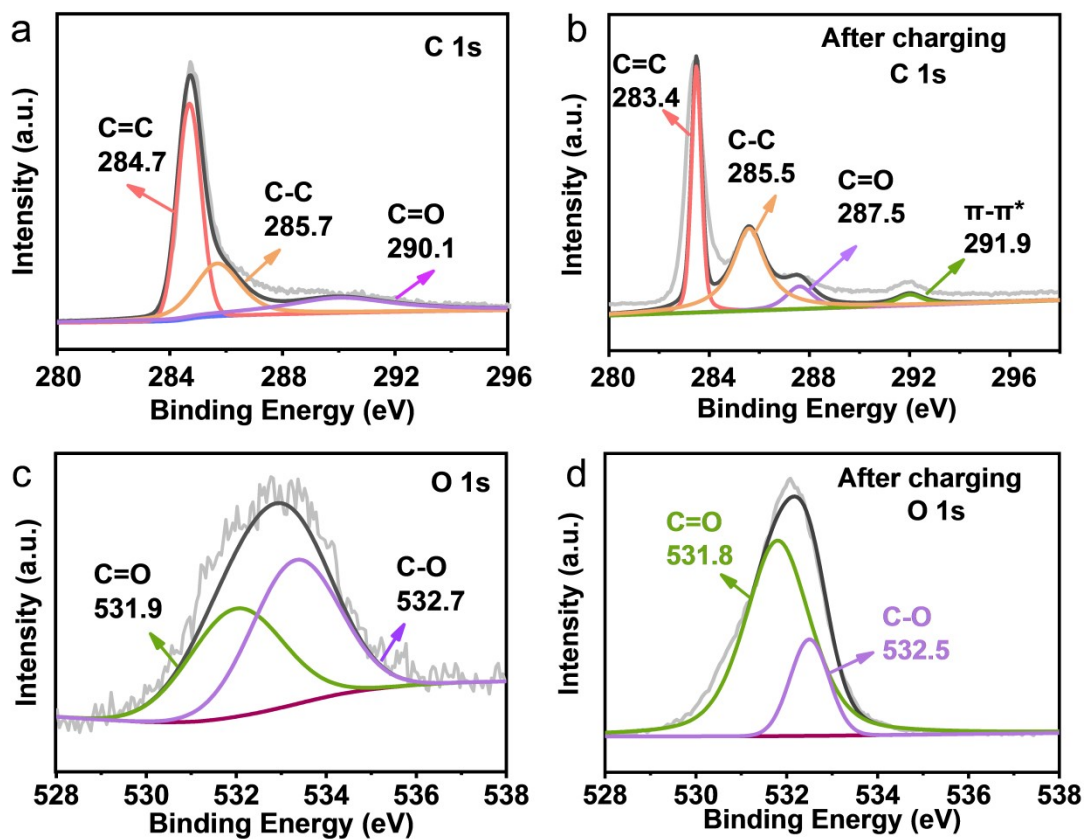

**Figure S9.** a and b) XPS peak of C1s before and after charging. c and d) XPS peak of O1s before and after charging.

As indicated in **Figure S9a**, the high-resolution C 1s spectrum shows that a main peak of 284.7 eV corresponds to C=C, and two sub-peaks are concentrated at 285.7 eV and 290.1 eV, corresponding to C-C and C=O. moreover, the high-resolution O 1s peak in **Figure S9c** corresponds to the C=O and C-O bond. After the illumination cycle, the intensity of C 1s peak increased, but the O 1s peak decreased significantly, as shown in **Figure S9b and S9d**, indicating the decrease of oxygen-containing functional groups.

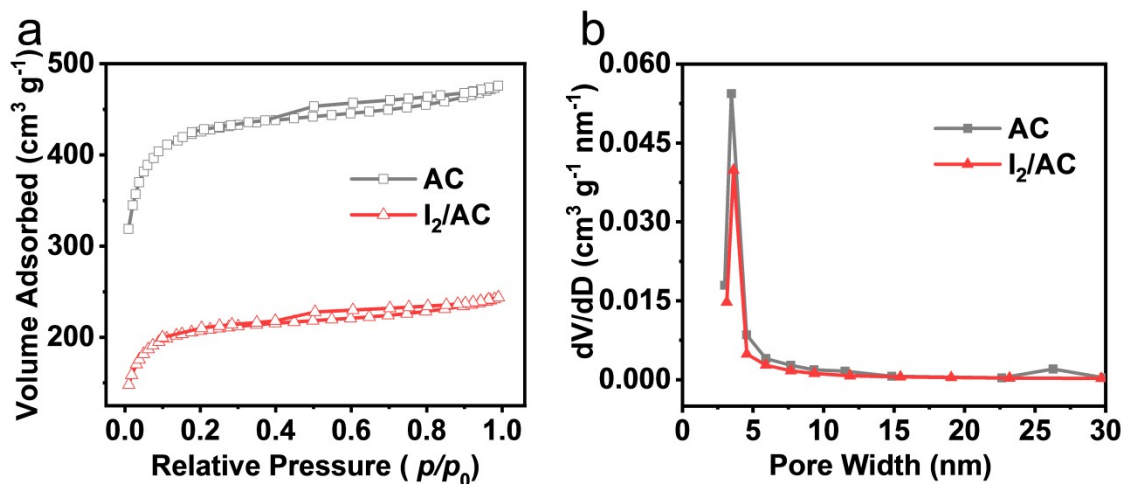

**Figure S10.** a) The inset shows the corresponding nitrogen sorption isotherms of AC and I<sub>2</sub>@AC composites. b) The pore size distribution curve of AC and I<sub>2</sub>@AC composites.

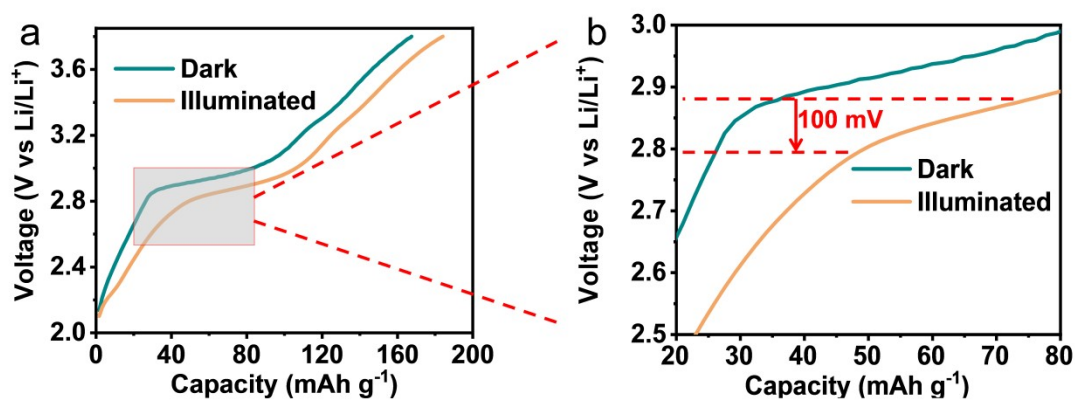

**Figure S11.** a) and b) The photoassisted charging curves at a current density of 100 mAh g<sup>-1</sup> of the photoassisted chargeable Li-I<sub>2</sub> battery under the illumination.

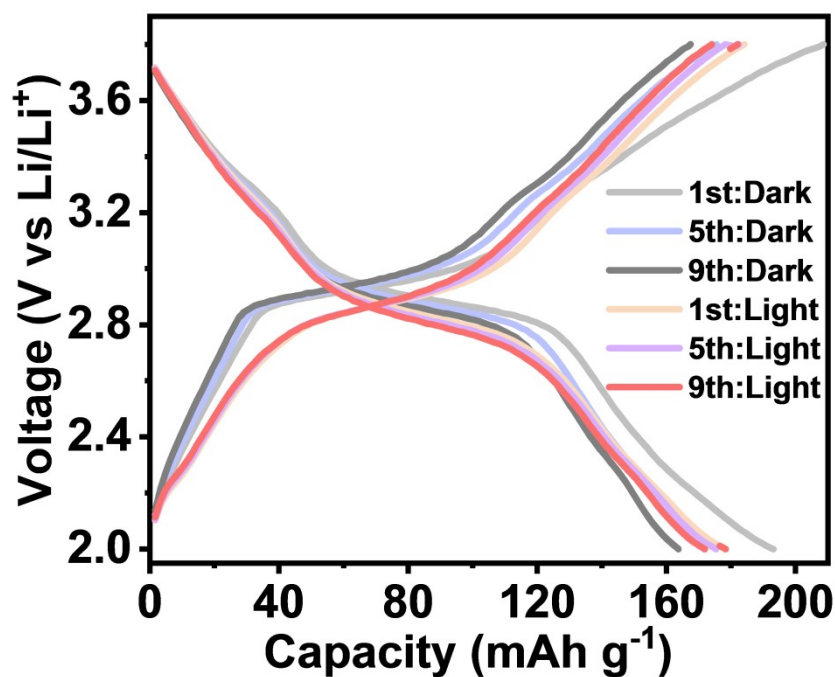

Figure S12. GCD curves at  $100 \text{ mAh g}^{-1}$  under dark and illuminated conditions.

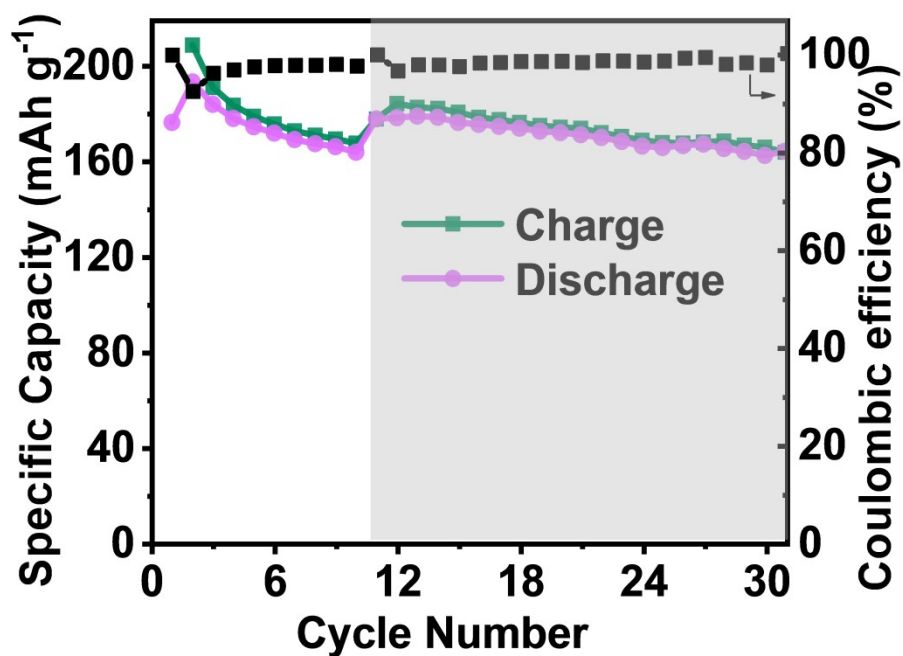

Figure S13. Cycle performance of the  $\text{I}_2@\text{AC}$  composites at  $100 \text{ mAh g}^{-1}$  rate under dark and illuminated conditions (the shaded region).

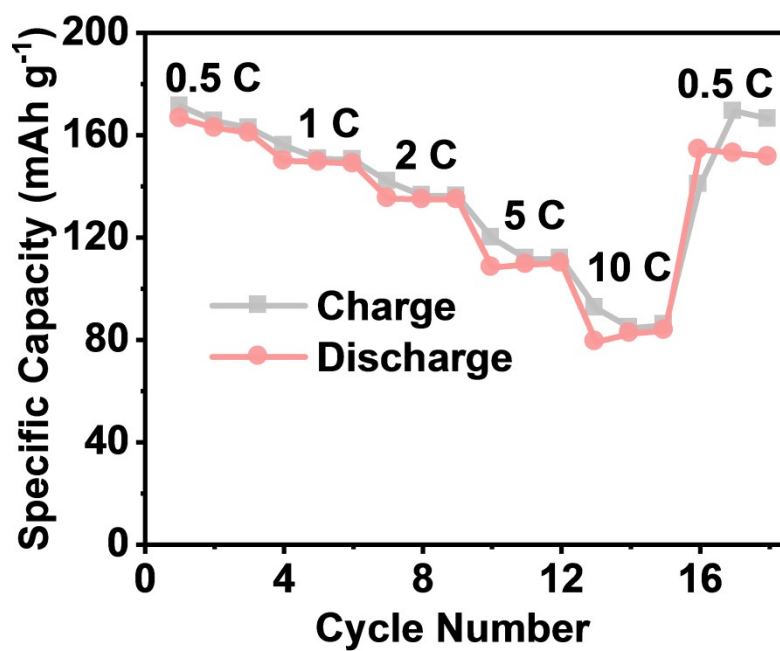

Figure S14. Rate capabilities of the as-prepared I<sub>2</sub>@AC composites.

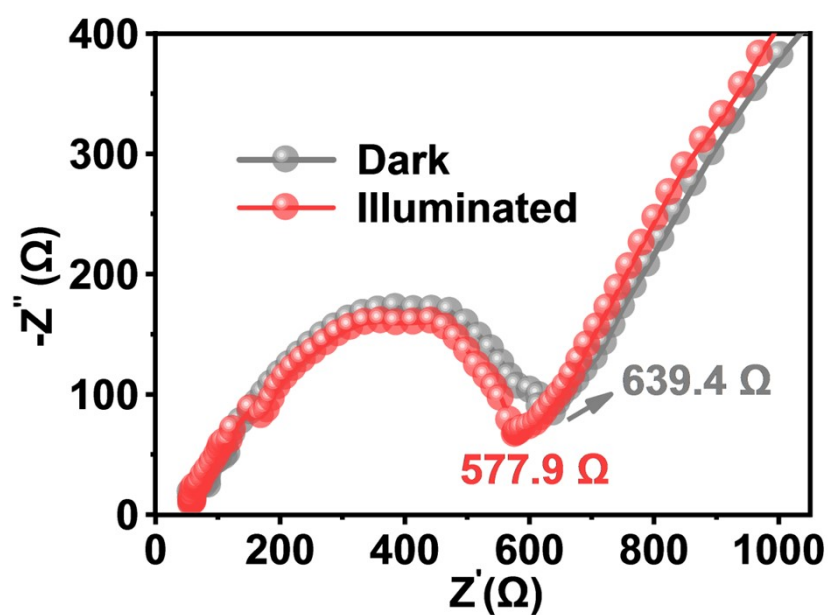

Figure S15. AC impedance spectra of the photoassisted rechargeable Li-I<sub>2</sub> battery in dark and illuminated conditions.

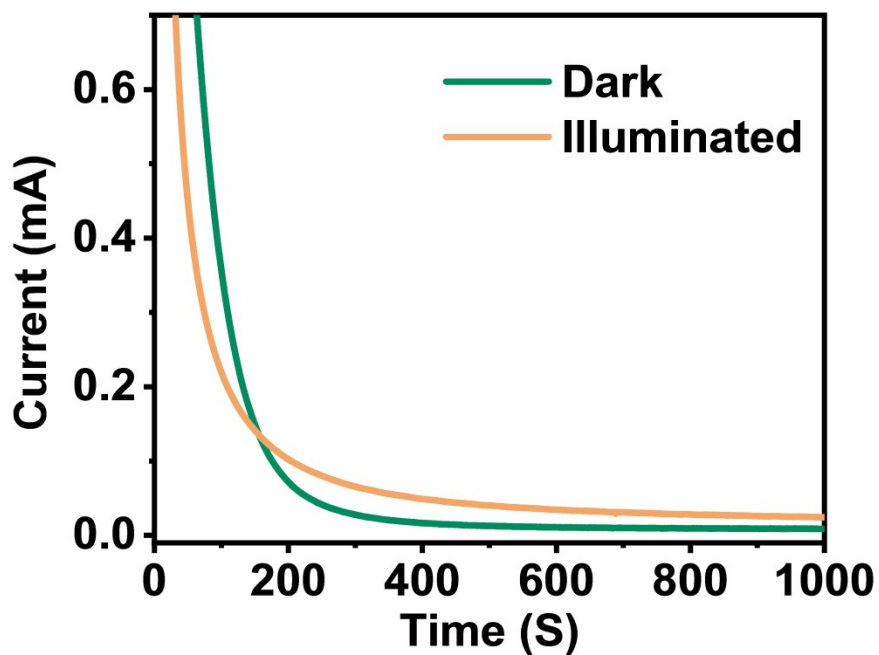

**Figure S16.** After fully discharged, the chronoamperometry curve of 1000 seconds of dark and illuminated under 3.1 V constant voltage charging.

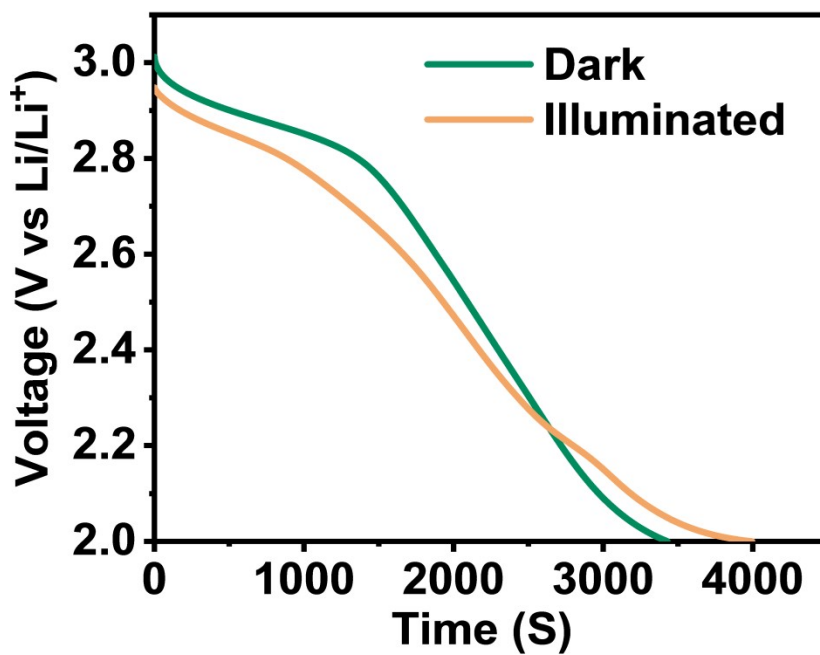

**Figure S17.** Constant current discharge curve after chronoamperometry test under dark and illuminated conditions.

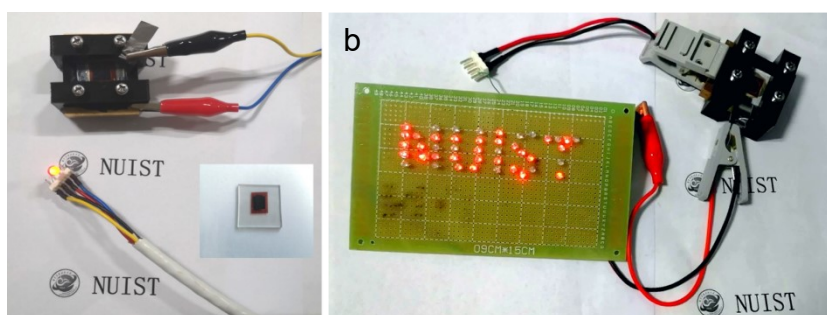

**Figure S18.** Optical photos of an LED bulb and grouped LED powered by a photo-assisted rechargeable Li-I<sub>2</sub> battery, the inset shows the prepared electrode sheet.

**Table S1** A detail comparison of the performances of the recently reported Li-I<sub>2</sub> batteries. [2-7]

| Battery Types                                                  | Photo electrode                  | photocharging voltage | Specific capacity                                      | energy efficiency | Ref.             |
|----------------------------------------------------------------|----------------------------------|-----------------------|--------------------------------------------------------|-------------------|------------------|
| Aqueous Li-I <sub>2</sub> Battery                              | Dye z907                         | 2.9 V                 | 89 mAh g <sup>-1</sup><br>(0.50 mA cm <sup>-2</sup> )  | 100 %             | 2                |
| Aqueous Li-I <sub>2</sub> Battery                              | α-Fe <sub>2</sub> O <sub>3</sub> | 3.43 V                | 160 mAh g <sup>-1</sup><br>(0.50 mA cm <sup>-2</sup> ) | 95.4 %            | 3                |
| chargeable Li-ion battery                                      | TiO <sub>2</sub>                 | 2.78 V                | 137 mAh g <sup>-1</sup><br>0.04 mA cm <sup>-2</sup>    | 121 %             | 4                |
| Li-I <sub>2</sub> batteries<br>(iodine/β-CD)                   | —                                | 3.0 V                 | 133mAh g <sup>-1</sup><br>(105.5 mA g <sup>-1</sup> )  | 93 %              | 5                |
| aqueous Zn-I <sub>2</sub> battery                              | TiO <sub>2</sub>                 | 0.56 V                | 83 mAh g <sup>-1</sup><br>(0.5 mA g <sup>-1</sup> )    | 93 %              | 6                |
| Aqueous Sodium-Ion Battery                                     | TiO <sub>2</sub>                 | 0.08 V                | 110 mAh g <sup>-1</sup><br>(0.50 mA cm <sup>-2</sup> ) | 111 %             | 7                |
| <b>Photo-assisted Li-I<sub>2</sub> Battery<br/>(This Work)</b> | Dye N719                         | 2.85 V                | 193 mAh g <sup>-1</sup><br>(105.5 mA g <sup>-1</sup> ) | 93 %              | <b>This Work</b> |

The energy efficiency ( $\eta$ ) of the photo-assisted battery can be expressed as:

$$\eta = E_{out} / E_{in} \times 100 \% \text{ [8]}$$

## Reference

1. M. Y. A. Rahman, A. A. Umar, R. Taslim and M. M. Salleh, *Electrochimica Acta*, 2013, **88**, 639-643.
2. M. Yu, W. D. McCulloch, D. R. Beauchamp, Z. Huang, X. Ren and Y. Wu, *Journal of the American Chemical Society*, 2015, **137**, 8332-8335.
3. Q. Zhang, Z. Wu, F. Liu, S. Liu, J. Liu, Y. Wang and T. Yan, *Journal of Materials Chemistry A*, 2017, **5**, 15235-15242.
4. Q. Li, N. Li, M. Ishida and H. Zhou, *Journal of Materials Chemistry A*, 2015, **3**, 20903-20907.
5. F.-s. Cai, Y.-q. Duan and Z.-h. Yuan, *Journal of Materials Science: Materials in Electronics*, 2018, **29**, 11540-11545.
6. Y. Man, Q. Hao, F. Chen, X. Chen, Y. Wang, T. Liu, F. Liu and N. Li, *ChemElectroChem*, 2019, **6**, 5872-5875.
7. Q. Li, N. Li, Y. Liu, Y. Wang and H. Zhou, *Advanced Energy Materials*, 2016, **6**, 1600632.
8. B. Deka Boruah, A. Mathieson, S. K. Park, X. Zhang, B. Wen, L. Tan, A. Boies and M. De Volder, *Advanced Energy Materials*, 2021, **11**, 2100115.
